# Supplementary material
Source: ML conference proceedings conference paper supplement (https://openreview.net/forum?id=zoNpnBlJWh)

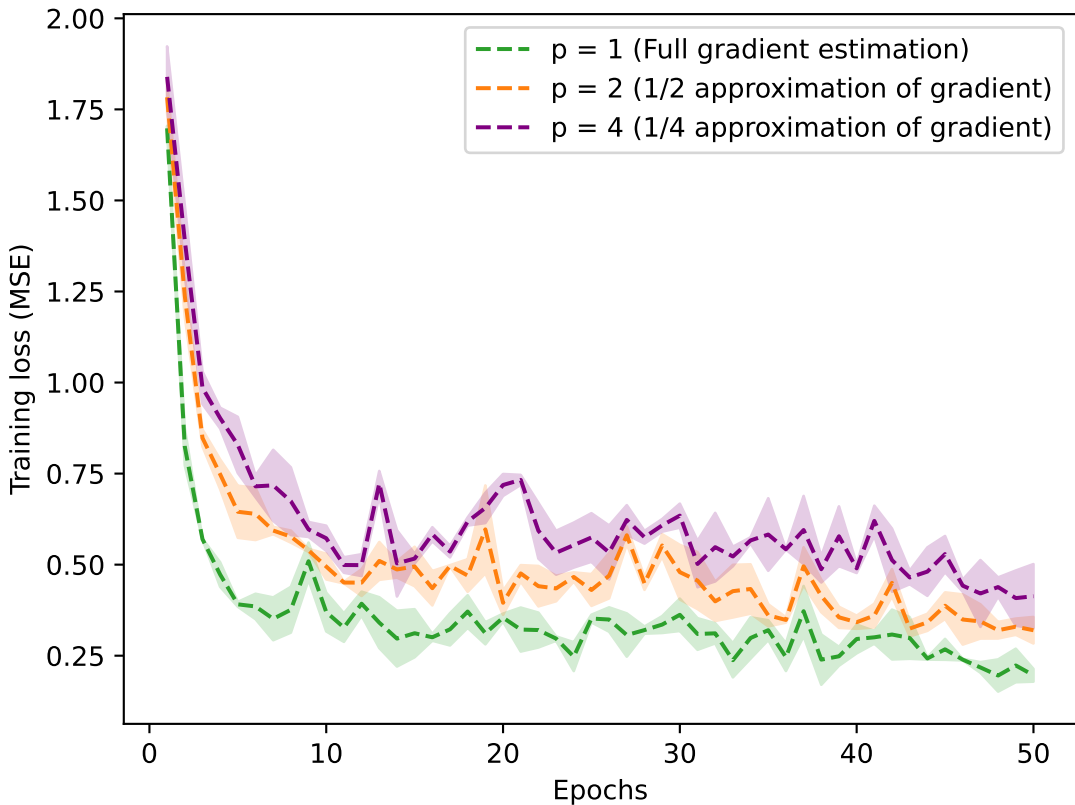

Supplement: supplementary_material [file convergence_p.pdf › Implementation/convergence_p.pdf]

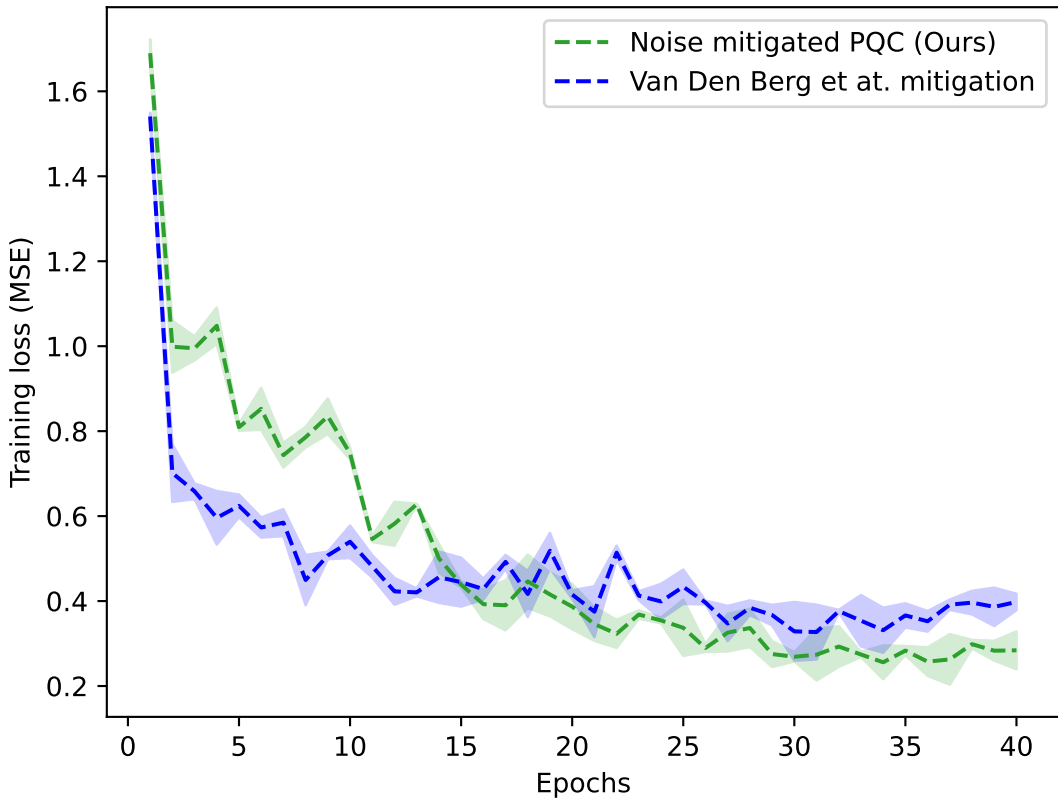

Supplement: supplementary_material [file dynamic.pdf › Implementation/dynamic.pdf]

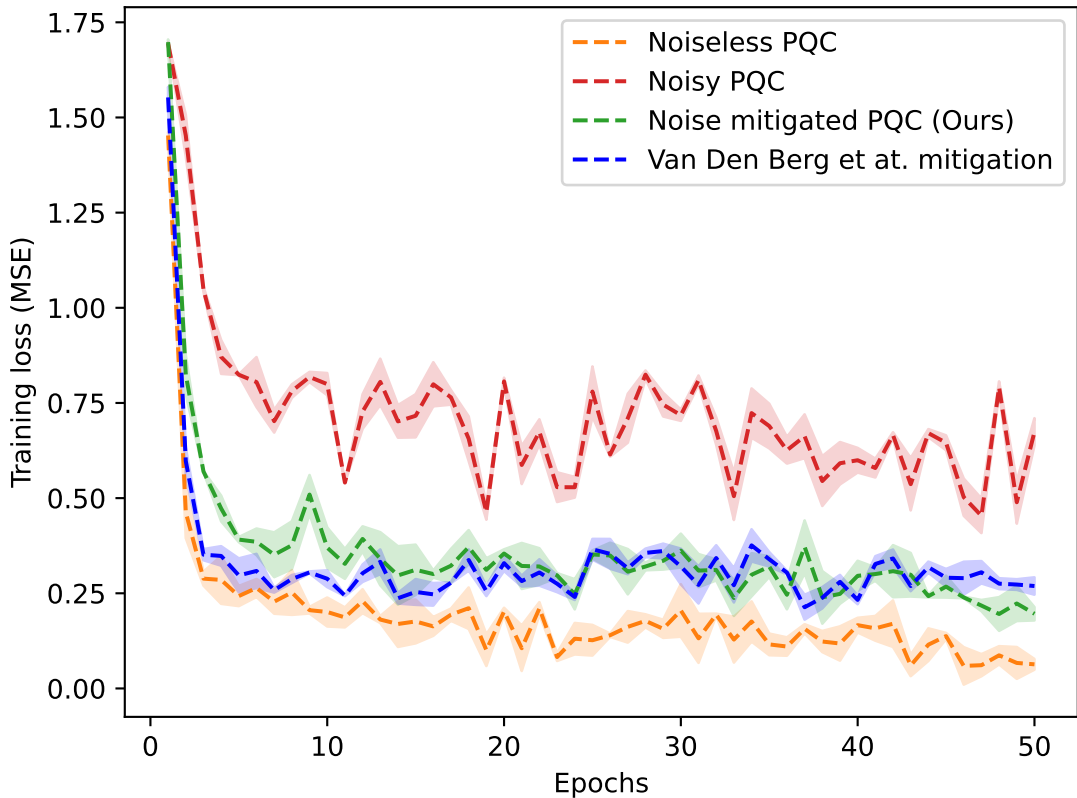

Supplement: supplementary_material [file loss.pdf › Implementation/loss.pdf]
